# Supplementary material for: Analysis of clinical characteristics and prognostic factors influencing the prognosis of female patients with melanoma of the genital tract
Source: Research Square preprint supplement (doi:10.21203/rs.3.rs-6530143/v1), 2025-07-07
Supplement: Supplementary file 1 [file 974aeb2ae8a06cab4daed70e.xlsx]

## Sheet: Sheet1
病案号	姓名	年龄	性别	更正诊断：	电话	出现症状时间	确诊时间	最后一次就诊时间	生存时间	基础疾病	是否绝经	家族史	HPV感染	发病部位	阴道（上段/中段/下段）	确诊（术前活检病理确诊/术前活检未确诊、仅诊断恶性肿瘤，术后病理确诊/活检检出/术前无活检、行肿物切除术后病理确诊）	主要症状	肿瘤最大径	侵及粘膜下	肿瘤分期	免疫组化	45.5769	病灶性状（结节样/菜花样/斑片样/溃疡）	单/双侧	色素沉着颜色	治疗前转移	治疗方法	手术	淋巴结清扫	术后辅助治疗	化疗方案（包括靶向）	生物治疗	免疫治疗	靶向治疗	治疗后复发	治疗后转移	器官	转移时间	基因突变
192704	凌云高	69	女性	外阴黑色素瘤	13308087198	2010.2	2010.5	2017.11	39	糖尿病	是	0	阴性	阴道	-	术前活检病理确诊	外阴瘙痒伴烧灼感	4cm	-	-	CK（-）Vimentin(-)S-100(+)P63(-)HMB45(+)Melan-A(+)KI67 10%	10	隆起	单侧	紫红色	无	化疗-手术+化疗-化疗-化疗-复发转移-化疗-化疗-化疗-化疗	外阴广泛切除术+阴道前壁及右侧壁病灶扩大切除术+阴道后壁修补术	无	化疗	（卡铂＋氮烯咪胺+司莫司汀）-（卡铂+氮烯咪胺）-（卡铂+司莫司汀+氮烯咪胺）-（卡铂+司莫司汀+氮烯咪胺）-（长春新碱+达卡巴嗪）-（长春新碱+达卡巴嗪）-（长春新碱+达卡巴嗪）-（长春新碱+达卡巴嗪）	0	0	0	有	右侧腹股沟淋巴结+右侧盆壁+骨转移	1		-
322528	鲁建英	64	女性	阴道黑色素瘤	18228539613	2017.12	2018.01	2021.8.17	83	0	是	0	-	阴道	中上段	术前活检病理确诊	阴道接触性出血	2cm	4mm	I期	CKP（-）Vimentin(-)S-100(+)P16(-)P63(-0HMB45(-)Melan-A(+)Syn-Cga(-)KI67 80%	80	结节	单侧	黑色	无	手术-化疗-化疗-化疗-化疗-复发-化疗-化疗-化疗-化疗-化疗	腹腔镜下广泛全子宫切除术+双附件切除术+盆腔淋巴结清扫术+肠粘连松解术+输尿管粘连松解术+全阴道切除术	有	化疗	（氮烯咪胺+DDP）-（达卡巴嗪+顺铂）-（达卡巴嗪+顺铂）-（达卡巴嗪+顺铂）-（达卡巴嗪+顺铂）-（紫杉醇-卡铂）-（紫杉醇-卡铂）-（紫杉醇-卡铂）-（紫杉醇-卡铂）-（紫杉醇-卡铂）	0	0	0	有	无	-		-
327033	马晓琴	41	女性	宫颈恶性肿瘤	13990501546	2018.04	2018.04	2018.11	20	0	否	0	-	宫颈	中下段	术前活检病理确诊	阴道不规则流血	2.5cm	-	PTTBN0Mx，FIGO1期	P-CK（-）Vimentin(+)CK5/6(-)S-100(+)P40(-)Melan-A(+)KI67 30-40%CD34(-)CD10(-)Desmin(-)EGFR(-)PLAP(-)E-cadherin(-)HMB45(+)CylinDl(+)ER(-)PR(-)EMA(-)P16(-)	40	外生型	单侧	无	左侧髂血管旁盆壁腹股沟淋巴结	手术+化疗-化疗-化疗-放疗-化疗-化疗-化疗-化疗	经腹广泛子宫切除术、双侧附件切除术、盆腔淋巴结切除术、副主动脉旁淋巴结切除术、双侧输尿管粘连松解术	有	化疗	（紫杉醇+卡铂）-（紫杉醇+卡铂）-（紫杉醇+卡铂）-（紫杉醇+卡铂）-（紫杉醇+卡铂）-（紫杉醇+卡铂）-（紫杉醇+卡铂）	0	0	0	有	肝转移	1		-
312084	宋桂芳	61	女性	外阴黑色素瘤	13908219465	2014	2014	2017.8	65	0	是	0	-	外阴	-	行肿物切除术后病理确诊	外阴皮肤溃烂，有血性分泌物	-	-	-	HMB45(+)S-100(++)Melan-A(+)p63(-)LCA(-)CK20(-)	-	-	-	-	-	手术-化疗-化疗-化疗-化疗-复发-化疗-化疗-化疗-化疗-化疗	外阴广泛切除术+外阴整形术	无	化疗	（恩度+DDP+DTIC)	0	0	0	有	双肺、肝脏、脾脏转移	1		BRAFV600E未发现15号外显子点突变、KIT exon9 11 13 17无突变
316405	向月凤	75	女性	阴道黑色素瘤	13551212390	2013	2013	2017.11	15	0	是	0	-	阴道	-	-	-	-	-	-	-	-	-	-	-	无	手术	-	-	无	无	0	0	0	有	右侧腹股沟淋巴结转移、双侧盆壁髂血管旁	-		-
354782	黄月芝	64	女性	外阴黑色素瘤	13688442793	2019.05	2019.6	2020.01	8	高血压	是	0	阴性	外阴	-	仅诊断恶性肿瘤，术后病理确诊	外阴瘙痒	2.1cm	Breslow厚度：0.4cm，Clark分级：3级	-	-	-	-	双侧	黑褐色	右侧腹股沟淋巴结、股深淋巴结	手术＋放疗+化疗-化疗-化疗-化疗-化疗-化疗	外阴广泛切除术+双侧腹股沟淋巴结清扫术	有	化疗	（达卡巴嗪+顺铂+表柔比星）-（达卡巴嗪+顺铂+表柔比星）-（达卡巴嗪+顺铂+表柔比星）-（达卡巴嗪+顺铂+表柔比星）-（达卡巴嗪+顺铂+表柔比星）-（达卡巴嗪+顺铂+表柔比星）	0	0	0	有	左侧腹股沟淋巴结	-		-
360465	唐才会	56	女性	外阴黑色素瘤	18090959420	2017.05	2017.08	2020.05	73	高血压	是	0	-	阴道	-	行肿物切除术后病理确诊	阴道皮肤变黑	3cm	-	-	HMB45(+++)S-100(+)Des(-)vim(+++)CK-P(-）MyoD1(-)Cal(-)CD10(+）CD117(+)CD34(-)KI67 40%	40	结节型	双侧	黑色	无	手术+化疗-干扰素-免疫治疗-化疗+靶向-化疗+靶向-化疗+靶向-放疗-化疗+靶向+免疫+放疗	-	-	化疗、放疗、免疫、靶向	（达卡巴嗪+顺铂）-（紫杉醇+卡铂+贝伐珠单抗）-（紫杉醇+卡铂+贝伐珠单抗）-（紫杉醇+卡铂+贝伐珠单抗）-（特瑞普利单抗+阿西替林）	0	特瑞普利单抗	贝伐珠单抗	有	左侧髂内血管旁及腹股沟淋巴结、肝转移、肺转移、骨转移、盆腔淋巴结转移	1		BRAFV600E（-）
329827	陈晓琳	51	女性	外阴黑色素瘤	15008470621	2018.5	2018.5	2018.10	79	甲肝	否	1	阳性	外阴	-	术前活检病理确诊	外阴不规则流血	1.5cm	Clark分级：3级Breslow:0.15cm	I期	S-100（+）HMB-45（+）MelanA（+）SOX10（+）CK（-）P63（-）KI67（30%）	30	隆起型	单侧	褐色 青灰色	无	手术+化疗-化疗-化疗-化疗-化疗	外阴广泛切除术+双侧腹股沟淋巴结清扫术+子宫全切术+双侧附件切除术 LEEP术	有	化疗	达卡巴嗪+顺铂+盐酸吡柔比星-同前-同前-同前-同前	0	0	0	无	肺	1	2018.7.17	-
341866	邓义祥	74	女性	外阴黑色素瘤	13320689639	2018.11	2018.12	2023-09	62	高血压	是	0	-	外阴	下段	术前活检病理确诊	阴道流血	1.5cm	Breslow厚度：0.6cm，Clark分级：4级	-	S-100（+）HMB-45（+）MelanA（+）SOX10（+）CK（-）Desmin(-)Myogenin(-) MyoD1(-)KI67（20%）EMA(-)CD138(-)Fli-1(+)ALK（-）	20	-	单侧	-	右侧腰大肌	手术+化疗-化疗	全麻下广泛性外阴切除术+阴道下段切除术+阴道后壁修补术		化疗	达卡巴嗪+顺铂+表柔比星-同前	0	0	0	无	右侧宫旁、双肺（肾）、胸膜、肋骨、纵膈、腹腔	1	2023.07	-
370325	李扬碧	62	女性	阴道黑色素瘤	13540946261/13438877993	2019.1	2020.01	2022-5	32	0	是	0	阴性	阴道	-	术前活检病理确诊	阴道不规则流血、白带增多、下腹部痛	3cm	-	-	PCK（-）CK5/6（-)P53(-)P40(-)EMA(-)S-100(+)HMB45(+)MelanA（+）Desmin（-）SMA（-）KI67（40%）	40	-	单侧	黑色	无	化疗+放疗-2.3周期化疗增敏+免疫-口服化疗+靶向+肺转移灶放疗+免疫维持	未手术	无	未手术	顺铂-顺铂-顺铂-顺铂-替莫唑胺+贝伐珠单抗	0	卡瑞利珠单抗不耐受→信迪利单抗	贝伐珠单抗	无	肝、胰腺 、右肺	1	2022.02.08	-
287570	王会如	47	女性	尿道黑色素瘤	18048523540	2016.09	2016.1	2024-02	95	乙肝	否	0	-	会阴	下段	术后病理确诊	阴道不规则流血	2.5cm	-	-	S-100（+）HMB45（+）A103（+）PCK（+）KI67（20%）	20	隆起型	单侧	褐色	双侧腹股沟淋巴结	外院手术-化疗+生物治疗（重组人白介素-2）-手术+化疗+干扰素免疫治疗-化疗+干扰素-化疗-放疗	会阴包块切除术-双侧腹股沟淋巴结清扫术-左腹股沟肿瘤切除术+临近皮瓣修复术-尿道外口肿瘤切除术+尿道外口成形术+腹腔镜辅助下盆腔淋巴结清扫术-左腹壁肿瘤切除术+会阴部肿物切除术-阴道肿瘤切除术-左颈部区域淋巴结清扫（颈部巨大肿瘤扩大切除）+胸导管结扎-上肢肌肉病损切除术（左肩部肿物切除术）	无	化疗、生物治疗、免疫治疗、	达卡巴嗪-DTIC-达卡巴嗪-白蛋白紫杉醇+卡铂+恩溢-帕博利珠单抗+阿昔替尼	1	干扰素、帕博利珠单抗、特瑞普利单抗	0	有	左侧腹股沟淋巴结、左大腿根部肿块-尿道外口、左侧盆腔淋巴结-肝、左侧颈后三角、左侧锁骨上、左下腹壁多发软组织肿块、左侧颈后三角、左侧闭孔区、左大腿根部、肺-左肩胛提肌旁、左侧髂窝、骨	1	2017-12 2018-7	-
313803	周琼芳	59	女性	宫颈黑色素瘤	18048136698/18280282949	2017.08	2017.9	42979	6	糖尿病	是	0	阳性	宫颈	-	术前活检病理确诊	阴道不规则流血	2.6cm	-	IIIA期	CK5/6(-)CK8/18(-)PAX8(-)P63(-)P16(-)Syn(-)CD56(+)CgA(-)ER(-)CK(-)EMA(-)Vimentin(+)TIF-1(-)S-100(+)Desmin（-）Myogentin(-)MyoD1(-)HMB45(+)MelanA(+)SOX-10(+)KI67(40%)	40	结节型	-	-	无	化疗	-	无	未手术	达卡巴嗪+顺铂+恩度	重组白介素-2+重组白介素a-b	0	0	无	无	-	-	-
386369	洪友召	58	女性	阴道黑色素瘤	18608119155	2020.06	2020.6	2021.02	54	0	否	0	-	阴道 外阴	中下段	术前活检未确诊、仅诊断恶性肿瘤，术后病理确诊	白带增多伴腥臭味	2.1cm	-	-	HMB45(+)S-100(+)Melan-A(+)Syn(-)CgA(-)LCA(-)EMA(-)CK-P(-)KI67(70%)	70	结节型	双侧	黑色	无	手术-化疗+靶向-化疗-化疗	外阴广泛切除术+双侧腹股沟淋巴结切除术+外阴整形术+尿道外口整形术+经阴道镜下部分阴道切除术	有	化疗 靶向	贝伐珠单抗+紫杉醇（白蛋白结合性）+卡铂-白蛋白紫杉醇+卡铂-同前			贝伐珠单抗	有	左侧闭孔区、双侧髂外血管旁及双侧腹股沟淋巴结	-		MET扩增 TP53突变 TMB 2.88Muts/Mb，MSS,NRAS,BRAF,KIT未突变。PD-L1免疫组化：TPS 15-20% CPS 20%
381303	秦少英	44	女性	外阴黑色素瘤	17308031314	2019.12	2020.07	2021.03	53	0	否	0	-	外阴	-	术后病理确诊	外阴皮肤发黑	1.5cm	Breslow厚度：0.6cm	T4N0M0 IIC期	HMB45(+)S-100(+)Melan-A(+)EMA(-)CK-P(-)KI67(75%)	75	斑片状 隆起	双侧	黑色	无	手术+化疗-放疗+免疫-化疗-化疗-化疗-化疗-化疗-化疗	外阴局部扩大切除术+外阴整形术+阴道部分切除术+外阴活检术		放疗 化疗 免疫	DTIC+DDP-白蛋白紫杉醇+顺铂-同前-同前-同前-同前-同前	0	0	0	无	无	-	-	KIT exon11突变，可能对伊马替尼等kit抑制剂敏感、KIT exon9/13/17未突变，BRAFV600E V600K 未突变，NRAS12/13/61密码子无突变
406712	李幼玲	58	女性	尿道、阴道黑色素瘤	13548023433	2021.01-2021.8	2021.08	2023.04	40	0	否	0	-	尿道+阴道	上段 2cm 顶端1cm	术前活检（子宫内膜来源）	子宫内膜肉瘤术后复查发现尿道口新生物，随后尿道口出血-阴道少量出血	3.5cm	-	T4N1M1 IV期	HMB45(+)S-100(+)SMA（-）Desmin（-）PCK（-）A103（+）BRAF(-)CD63(+)MITF(+)ER(+)PR(-)TFE3(-)p63(-)EMA(+-)CD10(-)KI67(40%)	40	溃疡性	单侧	黑褐色	肺、肝、脾、脑	手术-手术-化疗+靶向+免疫-靶向+免疫-化疗-靶向+免疫+化疗-同前-同前-化疗-化疗+放疗+免疫+靶向-同前-同前-同前-化疗+靶向+免疫-化疗+靶向+免疫+放疗-PD1+CTLA4双免治疗（卡度尼里单抗）	腹腔镜广泛子宫切除术+双侧附件切除术+盆腔淋巴结清扫术+腹主动脉旁淋巴结清扫术+大网膜、阑尾切除术-根治性尿道切除+阴道前壁修复术+筋膜组织瓣成形术+膀胱镜检查+膀胱造瘘术		化疗 放疗 靶向 免疫	顺铂+贝伐珠单抗+特瑞普利单抗-特瑞普利+贝伐珠单抗+白蛋白紫杉醇-白蛋白紫杉醇-特瑞普利+贝伐珠单抗+白蛋白紫杉醇-同前-同前-白蛋白紫杉醇-白蛋白紫杉醇+贝伐珠单抗+特瑞普利+放疗（肺转移）-同前-同前-同前-特瑞普利+贝伐珠单抗+白蛋白紫杉醇-特瑞普利+贝伐珠单抗+替莫唑胺+放疗-PD1+CTLA4双免治疗（卡度尼里单抗）	0	特瑞普利单抗-卡度尼里单抗	贝伐珠单抗	有	右肺	1	2022.03	未检出EWSR1基因异位
411219	蒋星月	22	女性	会阴黑色素瘤	18728306743	2018	2021.09	2021.11	43	0	否	0	-	会阴	-	术前无活检、行肿物切除术后病理确诊	会阴部肿物	1cm	Breslow厚度：2.5mm		HMB45(+)A103(+)S-100(+)P53(+)KI67(30%)	30	溃疡	单侧	灰黑色	无	手术-化疗+免疫	局部切除术	无	化疗 免疫	达卡巴嗪+长春新碱+顺铂+特瑞普利	0	特瑞普利单抗	0	-	-	-	-	未检出BRAFV600E/K突变
367060	方兴琼	48	女性	外阴黑色素瘤	15284193791	2019.09	2019.11	2022.08	53	0	否	0	阴性	外阴	-	术前活检病理确诊	外阴赘生物（胡豆大小）	2cm	-	-	S-100（+）HMB-45（+）MelanA（+）SOX10（+）CK（-）EMA(-)Myogenin(-)MyoD1(-)MITF（+）KI67(40%)	40	-	单侧	黑色	无	手术-化疗-化疗-免疫-复发/转移-化疗-化疗-化疗	全麻下广泛性外阴切除术	无	化疗 免疫	达卡巴嗪+顺铂-同前-卡瑞利珠单抗-复发转移-紫杉醇+卡铂-同前-紫杉醇+卡铂	0	卡瑞利珠单抗	0	有	肺	1	2022.06	-
387075	王子华	64	女性	阴道黑色素瘤	15892286756	2019.08	2019.11	2020.12	45	0	是	0	-	阴道	-	术前活检病理确诊	白带增多伴异味，带血	-	-	IV期	CK（+）CK5/6(-)Vimentin(+)HMB45(+)MART-1（+）S-100(+)KI67（30%）	30	-	-	-	无	手术-化疗-化疗-化疗-化疗-免疫	腹腔镜下免举宫广泛子宫切除术+双侧附件切除术+盆腔淋巴结清扫术+肠粘连松解术+输尿管粘连松解术+全引导切除术+阴道封闭+膀胱部分切除+双侧腹股沟淋巴结清扫术	有	化疗 免疫	达卡巴嗪+顺铂-同前-同前-紫杉醇+卡铂-特瑞普利单抗	0	特瑞普利单抗	0	无	肝	1	2020.11	-
433410	翁联群	53	女性	阴道黑色素瘤	15884235129	2020.12	2020.12	2022.09	23	0	是	0	-	宫颈	-	术前活检病理确诊	阴道不规则流血	-	-	IV期	HMB45(+)S-100(+)Melan-A(+)EMA(+)P16(+)P63(+)KI67(10%)	10	-	单侧	-	是	靶向（2021.4-2021.12)-复发-免疫+靶向-靶向+化疗-同前	-	-	-	白蛋白紫杉醇-同前	0	帕博利珠单抗	贝伐珠单抗-同前	有	阴道下段、外阴部、尿道、膀胱、双侧盆壁、髂血管旁、腹股沟区淋巴结、肝、骨	1	2022.7	BRAFV600E、CDKN2A突变、HLA-1杂合缺失、PD-L1：TPS20% CPS30%
392319	胡金容	58	女性	宫颈黑色素瘤	15884507357	2020.05	2020.06	2021.11	47	0	是	0	-	宫颈、阴道	-	术前活检未确诊、仅诊断恶性肿瘤，术后病理确诊	阴道不规则流血	3cm	深度＜1/3宫颈肌壁，水平浸润超过宫颈内口向颈管内膜生长0.4cm	IIA1期	HMB45(+)S-100(+)Melan-A(+)CK9（-）KI67(40%)	40	外生性、菜花样	-	黑色	无	手术-化疗+PD-1抗体-化疗-同前-同前-同前-化疗-介入手术	经腹广泛子宫切除术、双侧附件切除术、盆腔淋巴结切除术、腹主动脉旁淋巴结取样术、肠粘连松解术-局麻下双侧掐内动脉造影及栓塞术止血	无	化疗 PD-1抗体	多西紫杉醇+卡铂-同前-同前-同前-同前-多西他赛+卡铂	0	PD-1抗体	0	有	双侧腹股沟、盆壁淋巴结	-	2021.2	-
393021	钟显蓉	71	女性	宫颈黑色素瘤	18280162427/13693486954	2010.1	2021.02	2021.8	12	0	是	0	阳性	宫颈、阴道	-	术前活检病理确诊	阴道不规则流血	-	-	IIIB期	HMB45(+)S-100(+)Melan-A(+)EMA(-)P16(-)P40（-）LCA(-)KI67（70%）	70	-	-	-	无	化疗-化疗-化疗-化疗	-	无	-	达卡巴嗪+顺铂-同前-同前-达卡巴嗪+卡铂	0	0	0	无	无	-	-	-
400551	杨洪秀	49	女性	阴道黑色素瘤	13908144073	2021.02	2021.05	2021.09	5	0	否	0	阴性	阴道	下段	术前活检病理确诊	腹股沟包块增大增多	4cm	-	IVB期	HMB45(+)S-100(+)Melan-A/MART-1(+)CK5/6(-)P63(-)SOX-10(+)MITF(+)P16(+)P40（-）LCA(-)KI67（40%）	40	外生性	单侧	黑色	是（肺、纵膈、骨、肝、双侧盆壁及腹股沟淋巴结及腹膜后淋巴结、乳腺、腰背部、臀大肌）	化疗-化疗+靶向-同前-同前	-	-	-	紫杉醇+卡铂-紫杉醇+卡铂+贝伐珠单抗-紫杉醇+卡铂+贝伐珠单抗-同前	0	0	贝伐珠单抗	-	-	-	-	-
424409	李蓉	44	女性	阴道黑色素瘤	13619094052	2021.08	2022.04	2022.09	32	0	否	0	阳性	阴道+宫颈	-	术前无活检、行肿物切除术后病理确诊	尿频，夜间明显，伴骶部不适	5.4cm	-	III期	HMB45(+)Ckpan（-）CD34(-)Desmin(-)SMA(-)S100(+)EMA(-)SOX-10(+)H3K27Me3（+）MelanA/MART-1(-)MITF(+)KI67(40%)	40	-	单侧	-	无	手术-放疗+化疗-放疗+化疗-放疗+化疗-化疗-同前-同前	经阴道子宫颈包块切除术+阴道前壁膨出修补术	无	化疗 放疗	达卡巴嗪+顺铂-同前-同前-同前-同前-同前	0	0	0	无	无	-	-	BRAFV600E（+-）
427415	卢香花	61	女性	阴道黑色素瘤	18227325258	2022.01	2022.01	2022.7	36	高血压、乙肝肝硬化	是	0	阴性	阴道	下段	术前无活检、行肿物切除术后病理确诊	阴道不规则流血	-	-	-	HMB45(+)S-100(+)Melan-A(+)Vimentin（+）PCK(-)Ckpan(-)P63(-)P16(+)p53(+)ki67(60%)	60	-	单侧	-	无	手术-化疗+靶向-化疗	阴道赘生物切除术	无	化疗 靶向	白蛋白紫杉醇+卡铂+贝伐珠单抗-白蛋白紫杉醇+卡铂	0	0	贝伐珠单抗	无	阴道下段偏左侧及左旁间隙	-	2022.6	BRAFV600E（-）
444370	曾志会	68	女性	阴道黑色素瘤	13458388203	2023.01	2023.01	2023.07	19	0	是	0	阴性	阴道	下段	术前活检病理确诊	阴道不规则流血，左下腹胀痛不适	1.5cm	-	-	PCK(-)S-100(+)P16(-)HMB45(-)MelanA（+）P63(-)ck7（-）CK5/6(-)P53（60%）KI67（60%）	60	-	单侧	灰红色	无	化疗+免疫-同前-同前-同前	-	-	-	达卡巴嗪+顺铂-同前-同前-靶向	0	PD-1抗体-PD1-PD1信迪利单抗-同前	伊马替尼	无	腹股沟淋巴结	-	2022.07	-
449720	苏顺昭	60	女性	阴道黑色素瘤	18384166179/17360089691	2023.01	2023.04	2024.1	20	0	是	0	阴性	阴道	下段	术前活检病理确诊	阴道流黄色液体	2.5cm	-	-	CkpanAE1/3(-)EMA(-)SOX-10(+)MelanA/MART1(+)mitf(+)CD117(+)P16(-)P40(-)P63(-)HMB45(+)S-100(+)Vimentin（+）LCA(-)CD20(-)KI-67(30%)	30	-	单侧	黑色	无	化疗+免疫-免疫-化疗+免疫-化疗+免疫-放疗+化疗				达卡巴嗪+顺铂-信迪利单抗-达卡巴嗪+顺铂+信迪利单抗-达卡巴嗪+顺铂+信迪利单抗-替莫唑胺-白蛋白紫杉醇+卡铂+贝伐珠单抗-白蛋白紫杉醇+卡铂+贝伐珠单抗	0	信迪利单抗	贝伐珠单抗	有	骨、腹膜、网膜、系膜、双侧腹股沟区、肝	1	2024.09	微卫星不稳定MSI检测稳定
245852	龚林玉	50	女性	宫颈黑色素瘤	13350259125/18990852952	2014.03	2014.04	2014.04	53	0	否	1	-	宫颈	-	术前活检病理确诊	性接触出血，白带带血	4cm	-	-	Ckpan(-)EMA(-)P16(+)P63(-)S-100(+)Melan-A（+）HMB-45（+）Vimentin（+）LCA(-)MPO(+-)CD138(+-)KI67(70%)	70	-			有（双侧盆壁肿大淋巴结）	免疫	-	-	-	-	-	IL-2	-	-	-	-	-	-
412385	尚彦芬	61	女性	外阴黑色素瘤	13419006348	2017	2021.1	2022.02	3	高血压、糖尿病	是	0	-	外阴	-	术前活检病理确诊	外阴色素加深，小阴唇溃疡	0.5cm	-	-	Ckpan(-)EMA(-)S-100(+)HMB-45（+）Melan-A（+）MITF（+）P16(+)P53(突变过表达)BRAFV600E（+）CyclinD1（+）BCL-2(+)PTEN(+)KI67(40%)	40	增生性	双侧	黑色	无	化疗+免疫	-	-	-	紫杉醇+卡铂-同前-同前-同前（放弃手术）	0	0	0	无	无	-	-	BRAFV600E（+）
417824	张敬平	58	女性	阴道黑色素瘤	18090531866	2022.01	2022.01	2022.06	8	0	是	0	阳性	阴道	中段	术前活检病理确诊	发现阴道包块，接触性阴道流血	3cm	-	-	CkpanAE1/3(-)CK5/6（-）EMA(-)SOX-10(+)HMB45(-)mitf(+)MelanA/MART1(-)Desmin（-）CD45（LCA）（-）CgA(-)Syn（非特异着色）KI-67(25%)	25	结节型	单侧	-	无	化疗-化疗-化疗-化疗	-	-	-	达卡巴嗪+顺铂-同前-同前	0	0	0	无	无	-	-	-
434389	沈淑香	58	女性	阴道及宫颈黑色素瘤	18990050003	2022.06	2022.08	2023.07	36	0	是	1	阴性	阴道+宫颈	-	术前活检病理确诊	阴道出血	1.5cm	2mm	-	HMB45（+）MelanA（+）S-100（+）caldesmon（-）EMA(-)LCA(-)SMA(-)Desmin（-）CD10（+）CyclinD（+）	-	-	双侧	灰褐色	无	化疗+免疫-化疗+免疫-同前-手术-化疗-化疗-化疗-同前-同前-同前	具体术式不详	不详	化疗	达卡巴嗪-达卡巴嗪-达卡巴嗪-手术-替莫唑胺+顺铂-替莫唑胺+顺铂-同前-同前-同前-同前	0	特瑞普利单抗-特瑞普利单抗-同前	0	无	无	-	-	PD-L1（-） TPS＜1% TP53错义突变
413888	卢合燕	37	女性	阴道黑色素瘤	15328381881	2021.08	2021.11	2022-02	8	0	是	0	-	阴道	-	术前活检病理确诊	阴道不规则流血	3.5cm	-	-	Ckpan(-)S-100(+)HMB45(+)MelanA(+)MITF(+)SOX-10(+)KI67(30%)	30	-	单侧	棕褐色	无	化疗+靶向-化疗+靶向-同前		-	-	多西紫杉醇+吉西他滨+贝伐珠单抗-同前-同前			贝伐珠单抗	无	无	-	-	BRAFV600E（-）PD-L1(10%)
414225	吉俄克洛莫	57	女性	外阴黑色素瘤	15884027926	2021.1	2021.12	2022.01	21	0	是	0	-	外阴	-	术前活检病理确诊	发现外阴肿块，质硬。触血阳性	4cm	-	III期	Ckpan（-）EMA(-)CD117(+)S100(+)SOX-10(+)HMB45(+)MelanA(+)Mitf(+)CD45(LCA)(-)ki67(70%)	70	菜花样	单侧	-	双侧盆壁、髂血管旁、腹股沟区淋巴结	化疗-化疗	-	-	-	达卡巴嗪+顺铂+表柔比星-同前	0	0	0	-	-	-	-	-
290429	黄晓琴	40	女性	阴道黑色素瘤	15528892417	2016.1	2016.12	2016.12	9	0	否	0	-	阴道	下段	术前活检病理确诊	外阴不规则流血	3cm	阴道壁＞1/2全层		HMB45（+）MelanA（+）S-100（+）EMA(-)LCA(-)CgA（-）Syn（-）KI67（90%）	90	-	双侧	黑色	无	手术	腹腔镜下广泛子宫切除术+盆腔淋巴结清扫术+肠粘连松解术+输尿管粘连松解术+经尿道膀胱镜右侧输尿管支架植入术+全阴道切除术+外阴广泛性切除术	有	-	-	-	-	-	-	-	-	-	-
299968	李秀銮	59	女性	宫颈黑色素瘤	13508230230	2016.12	2017.03	2017.06	5	0	是	0	-	宫颈	-	术前活检病理确诊	不规则阴道出血	2cm	阴道壁全层	-	HMB45(+)MelanA(+)MITF(+)PNL(+)S-100(+)KI67(80%)	80	内生型	-	黑色	无	手术+放疗	广泛子宫伴双侧附件切除术+双侧盆腔淋巴结清扫术+广泛肠粘连松解术	有	放疗	-	0	0	0	-	肝、骨	1	2017.06	-
454971	周利蓉	56	女性	阴道黑色素瘤	13541455338	2023.03	2023.05	2024.04	24	0	是	0	阴性	阴道	-	术前活检病理确诊	阴道不规则流血	3cm	-	-	HMB45(+)S-100(+)MelanA（+）SOX-10(+)CK5/6(-)Vimentin(+)PCK(-)Desmin(-)Mitf(+)Ki67(50%)	50	-	单侧	黑色	右侧髂血管旁淋巴结、宫颈右旁结节、右侧盆壁淋巴结、右侧髂骨	化疗+免疫-同前-同前-同前-同前-手术-化疗+免疫-同前-同前-同前-同前-同前-同前-免疫治疗维持一年	经腹广泛性子宫切除术+双侧附件切除术+盆腔淋巴结切除术+腹主动脉旁淋巴结切除术+盆腔粘连松解术+阴道上段切除术		化疗 免疫	达卡巴嗪-达卡巴嗪-达卡巴嗪-达卡巴嗪-达卡巴嗪-手术-达卡巴嗪-同前-同前-同前-同前	0	信迪力单抗-信迪力单抗-信迪力单抗-信迪力单抗-信迪力单抗-手术-信迪力单抗-同前-同前-同前-同前-同前	0	-	右髂内及闭孔淋巴结	-	-	-
427994	池书妮	25	女性	外阴黑色素瘤	18227291746	2021.06	2022.06	2022.08	30	甲减	否	1	-	外阴	-	行肿物切除术后病理确诊	发现外阴结节	0.7cm	-	-	S-100(+)SOX-10(+)HMB-45(+)MelanA(+)P63(-)CK5/6(-)P40(-)P53(-)KI67(25%)	25	-	单侧	灰褐色	无	手术-化疗-化疗-化疗	赘生物切除术	-	化疗	达卡巴嗪+顺铂-同前-同前	0	0	0	-	-	-	-	-
443771	刘淑君	72	女性	阴道黑色素瘤	13890303985	2020.12	2021.04	2023.02	26	0	是	0	-	阴道	-	术前阴道镜病理活检	阴道少量滴血	-	-	-	PCK(-)EMA(-)HMB45(-)MelanA(+)S-100(+)Vimentin(+)ki67(+)	-	-	-	-	无	化疗+免疫-化疗+免疫-化疗+免疫-化疗+免疫-免疫维持治疗+靶向治疗-放疗	-	-	-	白蛋白紫杉醇+替雷利珠单抗-白蛋白紫杉醇+替雷利珠单抗-白蛋白紫杉醇+替雷利珠单抗-白蛋白紫杉醇+替雷利珠单抗-替雷利珠单抗维持治疗+贝伐珠单抗（4周期）	0	替雷利珠单抗	贝伐珠单抗	有（2023.01）	肺	1	2023.01	阴性
428913	龚会群	54	女性	阴道黑色素瘤	13678333931/15883361415	2022.04	2022.04	2022.12	28	乙肝病毒携带者	是	0	阴性	阴道	上段	术前阴道镜病理活检	阴道不规则流血	3cm	1.1cm	IVB期	HMB-45(+)MelanA(+)S-100(+)Dexmin(-)CK-P(-)CD10(+)CyclinD(+)ICA(-)KI67(60%)	60	黏膜型	单侧	黑色	无	手术+化疗-化疗-化疗-化疗-化疗-化疗-化疗	经腹广泛全子宫切除术+全引导切除术+双侧输卵管卵巢切除术+盆腔淋巴结清扫术+腹主动脉旁淋巴结切除术+肠粘连松解术+输尿管粘连松解术+尿道整形术	有	化疗 靶向	紫杉醇+顺铂+贝伐珠单抗-白蛋白结合型紫杉醇+顺铂+贝伐珠单抗-同前-同前-同前-同前	0	0	贝伐珠单抗	-	肺、双侧髂内动脉旁、双侧闭孔淋巴结	1	2022.06	TPS8% CPS10%
433778	蔡国玉	78	女性	宫颈黑色素瘤	13438560283	2022.06	2022.08	2022.1	35	0	是	0	-	阴道 宫颈		术前活检病理确诊	阴道出血 黑褐色	1.9cm	-	-	Ckpan(-)EMA(-)P16(+)P63(-)Desmin（-）S-100(+)Melan-A（+）HMB-45（+）Mitf（+）SOX-10(+)TLE1(+)CD45/LCA(-)CD99(+)KI67(40%)	40	粘模型	-	黑色	无	化疗+免疫+放疗-放疗	-	-	-	达卡巴嗪+特瑞普利单抗	0	特瑞普利单抗	0	-	-	-	-	-
274334	王克英*X	49	女性	阴道黑色素瘤	13678004521/13728138012	2014.01	2016.01	2022.02	107	0	否	0	阴性	阴道	-	术前阴道镜病理活检	月经周期延长，阴道不规则流血，发现左腹股沟包块	1cm	1cm	IV期	CK（-）CK5/6(-)CK8/18(-)CK-L(-)LCA(-)Vimentin(+)P40(-)P16(-)P63(-)HMB45(+)S-100(+)Syn(-)CgA(-)CD56(+)MelanA(+)Myod1(-)KI67（40%）	40	-	单侧	-	左侧腹股沟淋巴结、骨	化疗	-	-	-	紫杉醇+卡铂+恩度	0	0	恩度	-	-	-	-	-
263769	冯卫华	76	女性	阴道恶性肿瘤	18980900628/13096785555	2015.01	2015.05	2016.03	50	脑血管萎缩	是	0	-	阴道	中段	术前病理活检	阴道不规则流血	1.5cm	2cm	-	P-CK（-）CK5/6(-)P63(-)CK8/18(-))EMA(-)LCK(-)HCK(-)Vimentin(+)S-100(+)HMB45(+)P40(-)Melan-A(+)LCA(-)CGA(-)SYN(-)CD56(-)KI67 40%	40	-	单侧	-	-	放疗-放疗-放疗	-	-	-	-	0	0	0	0	骨	1	2016.02	-
270394	李桂英	67	女性	阴道黑色素瘤	134080988990/13880136365	2014.1-2015.09	2015.1	2024.11	111	高血压、糖尿病	是	0	阳性	阴道	上段	术前活检病理确诊	下腹坠痛-阴道流液	3cm	达阴道壁间质近全层		Vimentin(+)S-100(+)HMB-45(+)MelanA(+)EMA(-)CK-P(-)KI67(50%)	50	-		黑色	无	手术+化疗-化疗-化疗+放疗-化疗-化疗-化疗+免疫-化疗+免疫-化疗（换方案）+免疫-同前-化疗（换方案）+免疫+靶向-化疗+靶向	经腹次广泛性子宫切除术+双侧附件切除术+阴道部分切除术+盆腔淋巴结清扫术+肠粘连松解术+输尿管松解术	有	化疗 免疫 靶向	顺铂+达卡巴嗪+长春新碱-同前-同前-同前-顺铂+达卡巴嗪+长春新碱+信迪力单抗-同前-紫杉醇+卡铂+信迪力单抗-同前-替莫唑胺+信迪力单抗+贝伐珠单抗-紫杉醇+卡铂+贝伐珠单抗（经济原因无法双靶点免疫治疗）	0	信迪力单抗	贝伐珠单抗	有（2023-05）	右侧闭孔内肌旁软组织结节	-	2023.09	-
261356	唐国英*	50	女性	外阴恶性肿瘤	18702850299	2015.02	2015.04	2017.02	32	糖尿病	否	0	阴性	外阴	-	外阴病灶切除活检	外阴出血	3cm	-	-	HMB45(+)S-100(+)KI67(5%)	5	-	单侧	黑色	无	手术-拒绝姑息性治疗	外阴广泛切除术+双侧腹股沟淋巴结清扫术+左侧前庭大腺囊肿剥除术	有	0	0	0	0	0	有	左侧腹股沟淋巴结、肺、肝、脾、盆壁淋巴结、髂血管旁淋巴结、骨	1	2017.02	-
257967	冯昌琼	52	女性	会阴黑色素瘤	13989200774	2014.07	2015.01	2016.03	8	0	是	0	阴性	外阴	-	行肿物切除术后病理确诊	外阴皮肤包块	2cm	-	IIIC期	CK(+)CD68(+-)MelanA(+)S-100(+)HMB45(+)Vimentin（+）	-	-	-	黑色	无	手术-手术-化疗+生物治疗-同前-化疗+生物治疗（换方案）-同前	广泛性阴阜切除术-双侧腹股沟淋巴结清扫术	无	化疗 生物治疗	顺铂+达卡巴嗪+长春地辛+重组人白介素-2+干扰素a-1b-同前-达卡巴嗪+长春地辛+洛铂+重组人白介素-2-同前	重组人白介素-2+干扰素a-1b	0	0	无	双侧腹股沟区	-	2015.11	-
464958	王朝君	65	女性	阴道黑色素瘤	13808046659/15881126013	2023.09	2023.09	2024.04	15	高血压	是	0	-	阴道	中上段	术前活检未确诊、仅诊断恶性肿瘤，术后病理确诊	阴道不规则流血	2cm	-	-	Ckpan（-）SOX-10(+)HMB45(+)MelanA(+)pan-TRK(+)CD34(-)Desmin（-）ki67(20%)	20	菜花样	单侧	黑色	无	手术-化疗+靶向-化疗+免疫+靶向-化疗+免疫+靶向+放疗-后装治疗-化疗+免疫+靶向-化疗+免疫+靶向-同前	宫腔镜检查术+宫腔镜下分段诊刮术+阴道壁活检术+阴道填塞术	无	化疗 靶向 免疫 放疗	紫杉醇+卡铂+贝伐珠单抗-紫杉醇+卡铂+贝伐珠单抗+信迪力单抗-同前-后装-紫杉醇+卡铂+贝伐珠单抗+信迪力单抗-紫杉醇+卡铂+贝伐珠单抗+信迪力单抗-紫杉醇+卡铂+贝伐珠单抗+信迪力单抗	0	信迪力单抗	贝伐珠单抗	无	无	-	-	BRAFV600E（-）PD-L1(+)
468570	陈梅	52	女性	阴道黑色素瘤	17378812769	2023.09	2023.1	2023.12	14	0	是	0	-	阴道	下段	术前病理活检	阴道不规则流血	-	-	IV期	HMB45（+）MelanA（+）S-100（+）Mitf（+）SOX-10(+)CyclinD1(+)P16（+）P40(-)P53(+)BCL-2(+)LCA(-)KI67(70%)PAN-TRK(-)PTEN(-)	70	结节状	单侧	黑色	腹主动脉旁、双侧髂血管旁、右侧闭孔区、右侧腹股沟淋巴结、肝	化疗+免疫-同前	-	-	-	达卡巴嗪+顺铂+特瑞普利单抗-同前	0	特瑞普利单抗	0	-	-	-	-	BRAFV600E（+）
286378	程家琼*X	53	女性	阴道黑色素瘤	13540203123	2016.09	2016.09	2016.1	2	0	是	0	-	阴道	中下段	术前病理活检	阴道不规则流血	2cm	-	-	PCK（-）CK5/6（-)P63(-)P40(-)P16(+)CK8/18(-)CGA(-)SYN(-)CD56(-)LCA(-)Vimentin(+)S-100(+)HMB45(+)MelanA（+）CD20(-)CD3(-)KI67（70%）	70	-	单侧	-	-	-	-	-	-	-	-	-	-	-	-	-	-	-
469426	李玉忠	63	女性	外阴黑色素瘤	18821917073/19934415005	2023.1	2023.11	2023.12	13	高血压	是	0	-	外阴	-	行肿物切除术后病理确诊	外阴肿痛、阴道不规则流血	6cm	-	-	S-100（+）HMB45（+）MelanA(+)MITF(+)SOX-10(+)CyclinD1(-)P16(+)P53(+)BCL2(+)Vimentin(+)ck(-)CK20(-)EMA(-)CD45(-)CK7(-)inhibin(-)NTRK(-)PTEN(+)KI67（60%）	60	-	单侧	-	无	手术	左侧外阴肿块切除术+外阴整形术+阴道填塞术	无	-	-	-	-	-	-	肺、盆壁及临近阴道残端肿块 左侧外阴区	1	2023.12	-
378706	杜振会	72	女性	阴道黑色素瘤	19113404315	2020.04	2020.07	2020.07	3	高血压	是	0	-	阴道	中上段	术前病理活检	阴道不规则流血	7cm	-	-	EMA(-)Vimintin(+)S-100(+)HMB45(+)KI67(20-30%)	30	-	单侧	蓝紫色	无	-	-	-	-	-	-	-	-	-	-	-	-	-
194170	周洛英	52	女性	阴道黑色素瘤	18782146264	2023.09	2023.11	2024.05	13	0	否	1	-	阴道	下段	术前病理活检	阴道前壁肿块	2cm	-	I期	Ckpan（-）CD117(-)S100(+)SOX-10(+)HMB45(-)MelanA(+)P40(-)P16(+)H3K27Me3(+)Mitf(-)Desmin(-)CD34(+)ki67(50%)	50	菜花样	单侧	-	无	化疗+靶向-化疗+靶向+放疗-化疗+靶向-同前-同前+放疗	-	-	-	紫杉醇+卡铂+贝伐珠单抗-同前-同前-同前-同前+放疗	0	0	贝伐珠单抗	-	-	-	-	PD1(-)CPS＜1
256641	张珠先	47	女性	阴道黑色素瘤	13438437701	2014.09	2014.12	2014.12	2	0	否	0	阴性	阴道	-	术前活检未确诊、仅诊断恶性肿瘤，术后病理确诊	外阴流黄色液体	4cm	-	IV期	CK(-)EMA(-)HMB45(+)MelanA(+-)S-100(+)Vimentin(+)CD117(+)SMA（-）P63(-)CD34(-)ki67(70%+)	70	-	单侧	紫色	右侧盆壁淋巴结、肺	手术	腹腔镜探查术+阴道包块切除术+经腹分粘术+双卵巢肿瘤剥除术+右输卵管切术	无	-	-	-	-	-	-	-	-	-	-
458192	姜淑琼	68	女性	宫颈黑色素瘤	13808210106	2019	2023.07	2023.07	10	高血压	是	0	-	宫颈	-	术前病理活检	阴道不规则流血	0.5cm	宫颈间质浅1/3层	-	HMB45(+)MelanA(+)EMA(+)Vim(+)S-100(+)KI67(30%)	30	-		黑色	无	手术-转移-放疗-靶向	经腹广泛性子宫切除术+双侧附件切除术+肠粘连松解术+输尿管松解术+盆腔淋巴结清扫术+腹主动脉旁淋巴结取样数	有	-	-	-	-	伊马替尼	-	纵膈淋巴结、腰5椎体、左侧附件区、肝胃间隙、腹主动脉下段、降结肠、腰背部、下腹部结节、椎旁组织-纵膈及腹主动脉旁淋巴结、骨、肺-腹膜后软组织-锁骨上窝、纵膈内淋巴结	1	2022.11-2023.03-2023.06	KIT突变阳性、PDL1阴性，MSS,ABCB1突变阳性、XPC突变阳性、XPA突变阳性、AXIN2突变阳性、XRRCC1突变阳性
461750	张会兰	59	女性	阴道黑色素瘤	18608367893	2023.05	2023.06	2023.08	13	0	是	0	阴性	阴道	下段	术前活检未确诊、仅诊断恶性肿瘤，术后病理确诊	阴道流血	2cm	-	-	S-100(+)HMB45(+)des（-）CK(-)EMA(-)WT-1(+)CD99(+)RB(+)myoD1(-)	-	结节型	双侧	黑褐色	无	手术	腹腔镜经阴道联合全子宫切除术+双侧附件切除术+盆腔粘连松解术+部分阴道壁切除术	无	-	-	-	-	-	-	-	-	-	未检出有意义的EWSR1基因易位
283184	但学林	54	女性	阴道黑色素瘤	13990695851/13684091015	2016.02	2016.03	2016.08	6	0	是	0	-	阴道	中上段	术前病理活检	阴道不规则流血	3cm	-	IV期	CK(+)S-100(+)HMB45(+)MelanA(+)KI67(50%)	50	-	单侧	黑褐色	肺、肝、盆腔淋巴结、腹膜后淋巴结	-	-	-	-	-	-	-	-	-	-	-	-	-
470421	李玉秀 出院后于华西二院行手术治疗 7次化疗 2次免疫治疗 现中药维持治疗	49	女性	阴道黑色素瘤	15881126062	2023.11	2023.11	2023.12	13	0	否	1	-	阴道	中段	阴道镜术前病理活检	同房后阴道出血	2.5cm	Breslow厚度：0.9cm	-	Ckpan（-）SOX-10(-)HMB45(+)MelanA(+)Mitf（+）SOX-10(+)pan-TRK(+)ki67(60%)	60	结节型	单侧	黑紫色	无	手术	阴道壁囊肿剥除术	无	-	-	-	-	-	-	-	-	-	BRAFV600E（-）
344464	陈红兵	53	女性	阴道黑色素瘤	13308131959	2018.11	2018.12	2020.11	63	乙肝	是	0	-	阴道	中上段	阴道镜术前病理活检	阴道出血	2cm	-	I期	Vimentin（+）EMA(-)CKP(-)MelanA(+)S-100(+)HMB45(+)P63(-)CK5/6(-)CD56(-)Cga(-)Syn(+）HPL(-)HCG(-)DES(-)caldesmon(-)LCA(-)CD34(-)CD10(+)CyclinD1(+)E-Cadberin(-)KI67(65%)	65	-	单侧	黑	无	手术+生物治疗-免疫+后装治疗-免疫+后装-免疫+后装放疗-同前-同前-转移-免疫+靶向+化疗-免疫+靶向+化疗-进展-靶向-拒绝-帕博利珠单抗+口服安罗替尼-脑转移-姑息性放疗-靶向+化疗-靶向+化疗-靶向+化疗-同前-进展-靶向+免疫	阴道黑色素瘤局部扩大切除术+阴道后壁修补术	无	放疗 化疗 免疫 靶向 生物治疗	帕博利珠单抗+恩度+达卡巴嗪+顺铂-同前-白蛋白紫杉醇+卡铂+贝伐珠单抗-白蛋白紫杉醇+卡铂+贝伐珠单抗-同前-同前-特瑞普利单抗	白介素2+干扰素	帕博利珠单抗-帕博利珠单抗-帕博利珠单抗-同前-同前-同前-同前-同前	恩度-同前-恩度-安罗替尼-贝伐珠单抗-贝伐珠单抗-同前-同前-阿昔替尼	有 2020.09	肺、右侧腰大肌-脑、腹腔及盆壁软组织结节、骨、腹盆腔淋巴结-左乳、纵膈、肝、双侧肾上腺	1	2019.07-2020.06-2020.07	-
348732	王秀琼	53	女性	阴道黑色素瘤	15181906694	2018.1	2019.03	2019.1	7	0	是	0	-	阴道	中下段	阴道镜术前病理活检	阴道不规则流血	3cm	-	-	PCK(-)EMA(+)HMB45(+)MelanA(+)S-100(+)Vimentin(+)Mitf（+）LCA(-)CGA(-)SYN(-)CD56(+)ki67(40)	40	-	单侧	蓝紫色	无	化疗-化疗-化疗-化疗-放疗-化疗	-	-	-	达卡巴嗪+顺铂-达卡巴嗪+顺铂-达卡巴嗪+顺铂-同前-同前	0	0	0	无	无	-	-	-
349734	陈俊芳	56	女性	宫颈黑色素瘤	18837853266	2018.11	2019.04	2019.08	34	0	是	1	阴性	宫颈	-	阴道镜术前病理活检	阴道流液、腰痛	2cm	-	-	PCK(-)HMB45(-)MelanA(+)S-100(+)des（-）CK5/6(-)P63(-)CD34(-)Vimentin(+)ki67(35)	35	-	-	-	阴道	放疗+化疗-同前-放疗-放疗+化疗-化疗+放疗-化疗-化疗+免疫	-	-	-	紫杉醇+顺铂-同前-同前-同前-同前-紫杉醇+卡铂+特瑞普利单抗	0	特瑞普利单抗	0	无	无	-	-	-
310740	李兰	27	女性	阴道黑色素瘤	18280094412	2017.05	2017.08	2017.08	11	0	否	0	-	阴道	中下段	行肿物切除术后病理确诊	阴道流液	1cm	-	-	-	-	-	单侧	粉红色	无	手术-生物治疗+放疗-放疗	阴道赘生物切除术	无	-	-	重组人干扰素a	-	-	-	-	-	-	-
172738	胡英	50	女性	外阴黑色素瘤	13909038795/18080390939	2001	2001	2015.07	175	0	否	0	-	外阴	-	术前活检未确诊、仅诊断恶性肿瘤，术后病理确诊	左小阴唇褐色色素沉着	1cm	-	-	S-100(+)MART-1(+)HMB45(+)CK1(-)KI67(50%)	50	-	单侧	褐色	无	手术-放疗+化疗+干扰素免疫-手术-DTIC+干扰素+白介素-2-同前-同前-同前-氮烯咪胺+干扰素+白介素-2-同前-免疫治疗维持-干扰素+白介素-2-白介素-2+干扰素-DTIC+干扰素+白介素-2-同前-白介素2+干扰素--同前-进展-化疗（达卡巴嗪+顺铂）+白介素2+干扰素-达卡巴嗪+奈达铂-肝动脉灌注化疗及栓塞术（氮烯咪胺+奈达铂）-介入+白介素2+干扰素-介入（紫杉醇脂质体+卡铂）+紫杉醇脂质体化疗-介入+氮烯咪胺+奈达铂+干扰素+白介素2-同前-介入（达卡巴嗪+奈达铂）-香港自费免疫治疗-干扰素+白介素2	小阴唇切除术-全子宫切除术+双侧附件切除术+盆腔淋巴洁清除术+肠粘连松解术	无	化疗 放疗 免疫 生物治疗	福莫司汀-达卡巴嗪--氮烯咪胺-达卡巴嗪+顺铂-达卡巴嗪+奈达铂-氮烯咪胺+奈达铂	白介素-2	干扰素	0	有	左侧腹股沟-卵巢-肝、十二指肠淋巴结-腹腔广泛转移	1	2008.08-2009.08-2011.10	-
